# Supplementary material for: In situ Raman monitoring of electroreductive dehalogenation of aryl halides at an Ag/aqueous solution interface
Source: Royal Society of Chemistry journal article supplement (doi:10.1039/d2ay02060b), 2023-01-01
Supplement: d2ay02060b2.pdf [file d2ay02060b2.pdf]

# **In situ Raman monitoring of electroreductive dehalogenation of aryl halide at Ag/ aqueous solution interface**

Ying-Hua Zhou <sup>a,b,#</sup>, Chen-Chen Jiang <sup>b,#</sup>, Zhou Yu<sup>b,#</sup>, Ya-Hao Wang <sup>b,\*</sup>, Ju-Fang Zheng <sup>b,\*</sup>, Xiao-Shun  
Zhou <sup>b,\*</sup>

a. Jinhua Education College, Jinhua 321000, China

b. Key Laboratory of the Ministry of Education for Advanced Catalysis Materials, Institute of  
Physical Chemistry, Zhejiang Normal University, Jinhua 321004.

#. Corresponding authors

E-mails: jfzheng@zjnu.cn; yahaowang@zjnu.edu.cn; xszhou@zjnu.edu.cn

## Supplementary Figures

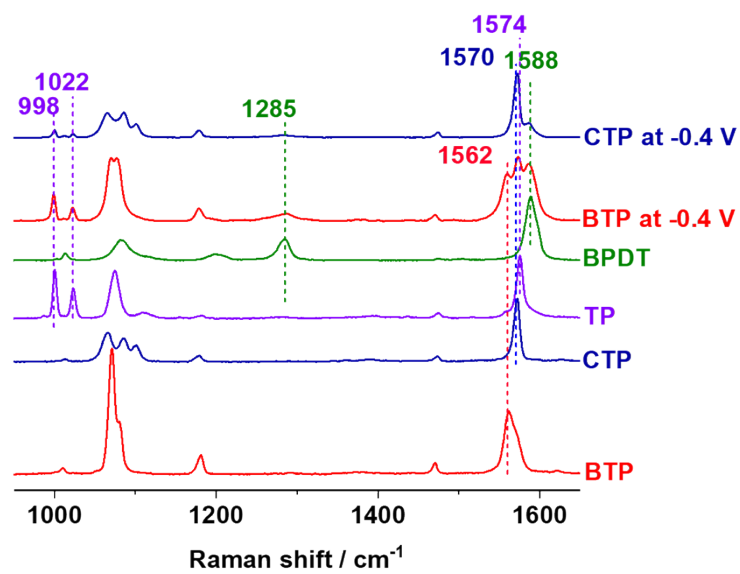

**Fig. S1** SHINERS spectra of commercial TP and BPDT on the Ag electrode compared to CTP and BTP at -0.4 V.
